# Supplementary material
Source: HighWire-hosted journal article supplement (https://bmjopen.bmj.com/content/13/7/e069531)
Supplement: inline-supplementary-material-1 [file inline-supplementary-material-1.pdf]

## Supplemental table 1

## EXTRACARDIAC ANOMALIES

| SUBGROUPS*   | # Patients | Heterotaxy       | Chromosomal anomalies <sup>1</sup> | Multiple malformations <sup>2</sup> | Syndromes <sup>3</sup> | Total             |
|--------------|------------|------------------|------------------------------------|-------------------------------------|------------------------|-------------------|
| • uAVSD      | 65         | 10               | 8                                  | 1                                   | 4                      | 23 (35.4%)        |
| • DILV       | 42         | 0                | 0                                  | 2                                   | 0                      | 2 (4.8%)          |
| • DORV       | 48         | 6                | 4                                  | 2                                   | 3                      | 15 (31.3%)        |
| • HLHS       | 238        | 0                | 5                                  | 5                                   | 3                      | 13 (5.5%)         |
| • MISC       | 79         | 6                | 3                                  | 3                                   | 0                      | 12 (15.2%)        |
| • PA-IVS     | 42         | 1                | 0                                  | 1                                   | 1                      | 3 (7.1%)          |
| • TA         | 81         | 1                | 1                                  | 5                                   | 4                      | 11 (13.6%)        |
| <b>Total</b> | <b>595</b> | <b>24 (4.0%)</b> | <b>21 (3.5%)</b>                   | <b>19 (3.2%)</b>                    | <b>15 (2.5%)</b>       | <b>79 (13.3%)</b> |

\* For abbreviations, see Methods.

<sup>1</sup> Trisomy 13, 18, 21, Turner syndrome

<sup>2</sup> Multiple congenital defects

<sup>3</sup> Ivemark, VACTERL, CHARGE, Apert, Eagle Barrett, Holt-Oram

## Supplemental table 2

## INITIAL SURGICAL PROCEDURES\*

| SUBGROUPS    | n          | Norwood I   | AP-shunt    | PAB        | BCPC       | VP-shunt  | Other     |
|--------------|------------|-------------|-------------|------------|------------|-----------|-----------|
| • uAVSD      | 40         | 1           | 18          | 9          | 4          | 5         | 3         |
| • DILV       | 39         | 0           | 12          | 14         | 8          | 4         | 1         |
| • DORV       | 42         | 1           | 18          | 9          | 6          | 3         | 5         |
| • HLHS       | 157        | 147         | 1           | 3          | 2          | 0         | 4         |
| • MISC       | 61         | 0           | 26          | 12         | 12         | 10        | 1         |
| • PA-IVS     | 35         | 0           | 29          | 0          | 0          | 0         | 6         |
| • TA         | 70         | 1           | 33          | 19         | 16         | 0         | 1         |
| <b>Total</b> | <b>444</b> | 150 (33.8%) | 137 (30.9%) | 66 (14.9%) | 48 (10.8%) | 22 (5.0%) | 21 (4.8%) |

\*For abbreviations, see Methods.

## Supplemental table 3

## Incidence of UVH births

| Year                                     | 1990   | 1995   | 2000   | 2005   | 2010   | 2015   |
|------------------------------------------|--------|--------|--------|--------|--------|--------|
| <b>Number of births in Norway</b>        | 60 940 | 60 290 | 59 230 | 56 760 | 61 440 | 59 058 |
| <b>Number of UVH<sup>1</sup> births</b>  | 17     | 23     | 21     | 25     | 25     | 14     |
| <b>Number of HLHS<sup>2</sup> births</b> | 8      | 4      | 14     | 8      | 7      | 6      |
| <b>Annual UVH incidence (‰)</b>          | 0.28   | 0.38   | 0.35   | 0.44   | 0.39   | 0.24   |

*Number of children with <sup>1</sup>univentricular heart and <sup>2</sup>hypoplastic left heart syndrome born alive*
