# Supplementary material
Source: HighWire-hosted journal article supplement (https://bmjopen.bmj.com/content/13/7/e069531)
Supplement: inline-supplementary-material-3 [file inline-supplementary-material-3.pdf]

**Supplemental figure 1:** Competing risk analyses of timing of BCPC vs. death among HLHS patients born in 1990-2002 vs. 2003-2015, surviving 30 days after initial surgery.

**Supplemental figure 2:** Cumulative survival after Fontan surgery among patients born in 1990-2002 (red) vs. 2003-2015 (blue).
