# Supplementary material
Source: HighWire-hosted journal article supplement (https://bmjopen.bmj.com/content/13/7/e069531)

## Supplemental figure 1

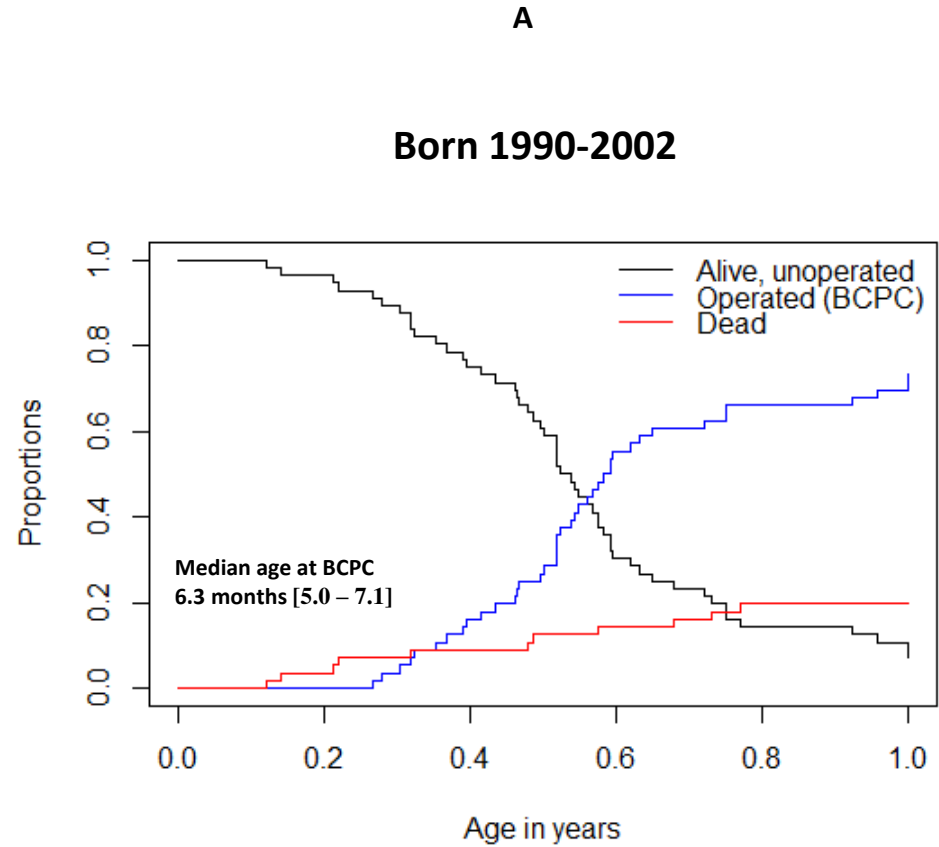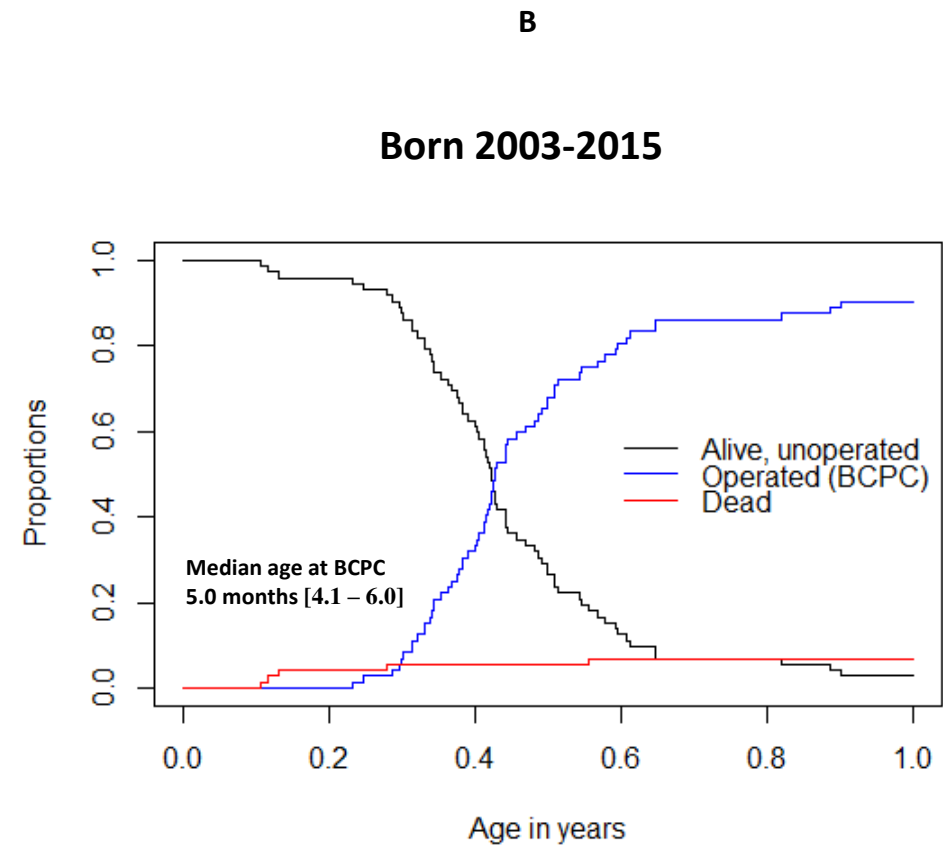

Supplement: inline-supplementary-material-2 [file inline-supplementary-material-2.pdf]

## Supplemental figure 2

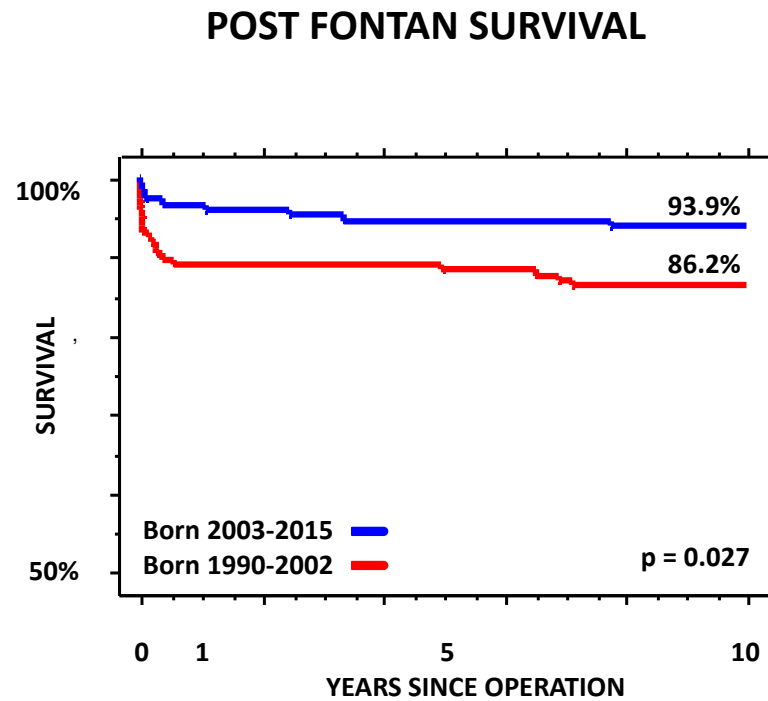AT RISK

|                       |     |     |     |     |
|-----------------------|-----|-----|-----|-----|
| <i>Born 1990-2002</i> | 145 | 129 | 128 | 125 |
| <i>Born 2003-2015</i> | 146 | 141 | 138 | 137 |

Supplement: inline-supplementary-material-4 [file inline-supplementary-material-4.pdf]
